# Supplementary material for: The preparation of oxidized methylcellulose crosslinked by adipic acid dihydrazide loaded with vitamin C for traumatic brain injury
Source: Royal Society of Chemistry journal article supplement (doi:10.1039/c9tb00816k), 2019-01-01
Supplement: c9tb00816k1.pdf [file c9tb00816k1.pdf]

## ***Electronic Supplementary Information (ESI)***

### **The preparation of oxidized methylcellulose crosslinked by adipic acid dihydrazide loaded with vitamin C for traumatic brain injury**

Che-Yung Kuan,<sup>ab</sup> Yu-Ying Lin,<sup>ab</sup> Ching-Yun Chen,<sup>b</sup> Chun-Chen Yang,<sup>c</sup> Chih-Ying Chi,<sup>ab</sup>  
Chi-Han Li,<sup>ab</sup> Guo-Chung Dong,<sup>\*ab</sup> and Feng-Huei Lin,<sup>\*abc</sup>

<sup>a</sup> Ph.D. Program in Tissue Engineering and Regenerative Medicine, National Chung Hsing University, Taichung, 40227, Taiwan.

<sup>b</sup> Institute of Biomedical Engineering and Nanomedicine, National Health Research Institutes, Miaoli County, 35053, Taiwan. E-mail: gcdong@nhri.org.tw

<sup>c</sup> Institute of Biomedical Engineering, College of Medicine and College of Engineering, National Taiwan University, Taipei, 10087, Taiwan. E-mail: double@ntu.edu.tw

**Table S1.** Abbreviation and definition of specimen.

| Abbreviation  | Definition                                                                                                                                                                                                                                                     |
|---------------|----------------------------------------------------------------------------------------------------------------------------------------------------------------------------------------------------------------------------------------------------------------|
| MC            | Methylcellulose                                                                                                                                                                                                                                                |
| oxi-MC        | Oxidized methylcellulose                                                                                                                                                                                                                                       |
| oxi-MC-ADH    | Oxidized methylcellulose cross-linked with adipic acid dihydrazide                                                                                                                                                                                             |
| oxi-MC-ADH-VC | For <i>in-vitro</i> study:<br>Oxidized methylcellulose cross-linked with adipic acid dihydrazide contented 2.5 mg/mL vitamin C<br>For <i>in-vivo</i> study:<br>Oxidized methylcellulose cross-linked with adipic acid dihydrazide contented 0.2 g/mL vitamin C |

**Table S2.** Modified neurological severity scores (mNSS) (S. F. Chen, Hsu, Huang, & Wang, 2008).

| Test                                                                             | Point     |
|----------------------------------------------------------------------------------|-----------|
| <b>Motor tests</b>                                                               |           |
| <b>Raising rat by the tail</b>                                                   |           |
| Flexion of forelimb                                                              | 1         |
| Flexion of hindlimb                                                              | 1         |
| Head moved 10° to vertical axis within 30 s                                      | 1         |
| <b>Placing rat on the floor</b>                                                  |           |
| Normal walk                                                                      | 0         |
| Inability to walk straight                                                       | 1         |
| Circling toward the paretic side                                                 | 1         |
| Fall down to the paretic side                                                    | 1         |
| <b>Sensory tests</b>                                                             |           |
| Placing test (visual and tactile test)                                           | 1         |
| Proprioceptive test (deep sensation)                                             | 1         |
| <b>Beam balance tests</b>                                                        |           |
| Balances with steady posture                                                     | 0         |
| Grasps side of beam                                                              | 1         |
| Hugs the beam and one limb falls down from the beam                              | 2         |
| Hugs the beam and two limbs fall down from the beam, or spins on beam (> 60 s)   | 3         |
| Attempts to balance on the beam but falls off (> 40 s)                           | 4         |
| Attempts to balance on the beam but falls off (> 20 s)                           | 5         |
| Falls off: No attempt to balance or hang on to the beam (< 20 s)                 | 6         |
| <b>Reflexes absent and abnormal movements</b>                                    |           |
| Pinna reflex (head shake when touching the auditory meatus)                      | 1         |
| Corneal reflex (eye blink when lightly touching the cornea with cotton)          | 1         |
| Startle reflex (motor response to a brief noise from snapping a clipboard paper) | 1         |
| Seizures, myoclonus, myodystony                                                  | 1         |
| <b>Maximum points</b>                                                            | <b>18</b> |

One point is awarded for the inability to perform the tasks or for the lack of a tested reflex; severity indicates severe injury (13-18), moderate injury (7-12); mild injury (1-6).

**Table S3.** Biochemical and hematological tests.

|                           | Control         | Hydrogel-treated TBI-rats |
|---------------------------|-----------------|---------------------------|
| GOT (U/L)                 | 69.00 ± 10.00   | 72.33 ± 13.80             |
| GPT (U/L)                 | 27.67 ± 5.03    | 23.67 ± 3.21              |
| ALP (U/L)                 | 812.67 ± 105.26 | 863.00 ± 91.04            |
| BUN (mg/dL)               | 16.27 ± 5.12    | 14.70 ± 0.33              |
| CRE (mg/dL)               | 0.30 ± 0.17     | 0.23 ± 0.06               |
| RBC (10 <sup>6</sup> /μL) | 8.49 ± 0.11     | 8.25 ± 0.71               |
| WBC (10 <sup>3</sup> /μL) | 11.89 ± 1.32    | 10.82 ± 1.20              |
| NE (10 <sup>3</sup> /μL)  | 2.57 ± 0.26     | 2.58 ± 0.69               |
| MO (10 <sup>3</sup> /μL)  | 0.78 ± 0.07     | 0.57 ± 0.12               |
| EO (10 <sup>3</sup> /μL)  | 0.06 ± 0.04     | 0.06 ± 0.04               |
| BA (10 <sup>3</sup> /μL)  | 0.04 ± 0.03     | 0.04 ± 0.04               |
| LY (10 <sup>3</sup> /μL)  | 70.63 ± 5.32    | 70.21 ± 5.05              |
| PLT (10 <sup>3</sup> /μL) | 840.00 ± 114.69 | 680.75 ± 211.00           |

GOT - Aspartate aminotransferase; GPT - Alanine aminotransferase; ALP - Alkaline phosphatase; BUN - Blood urea nitrogen; CRE- Creatinine; RBC- Red blood cell; WBC- White blood cell; NE- Neutrophil; MO- Monocyte; EO- Eosinophil; BA- Basophil; LY- Lymphocyte; PLT- Platelet.

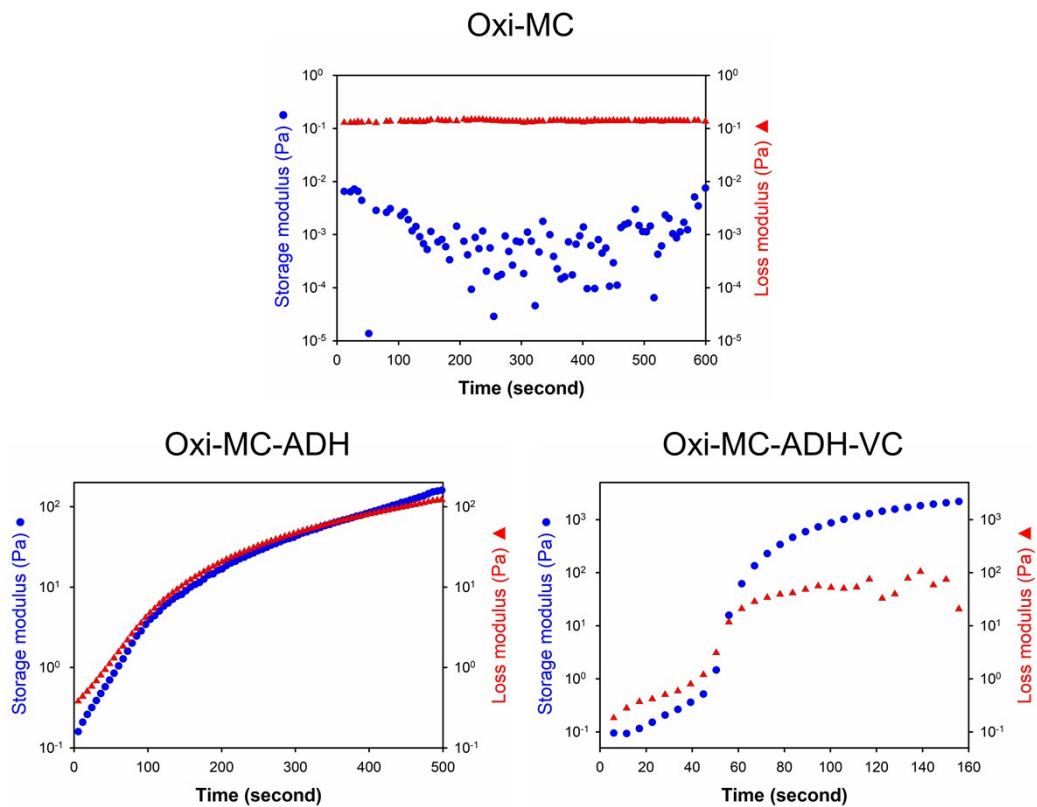

**Fig. S1** The rheological data of oxi-MC, oxi-MC-ADH, and oxi-MC-ADH-VC.

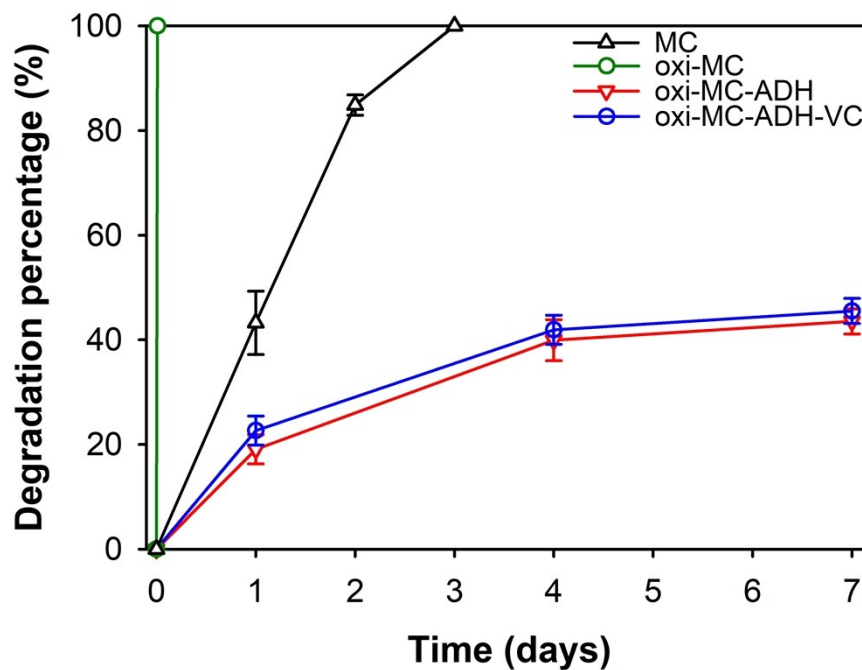

**Fig. S2** Degradation percentage of MC, oxi-MC, oxi-MC-ADH, and oxi-MC-ADH-VC.

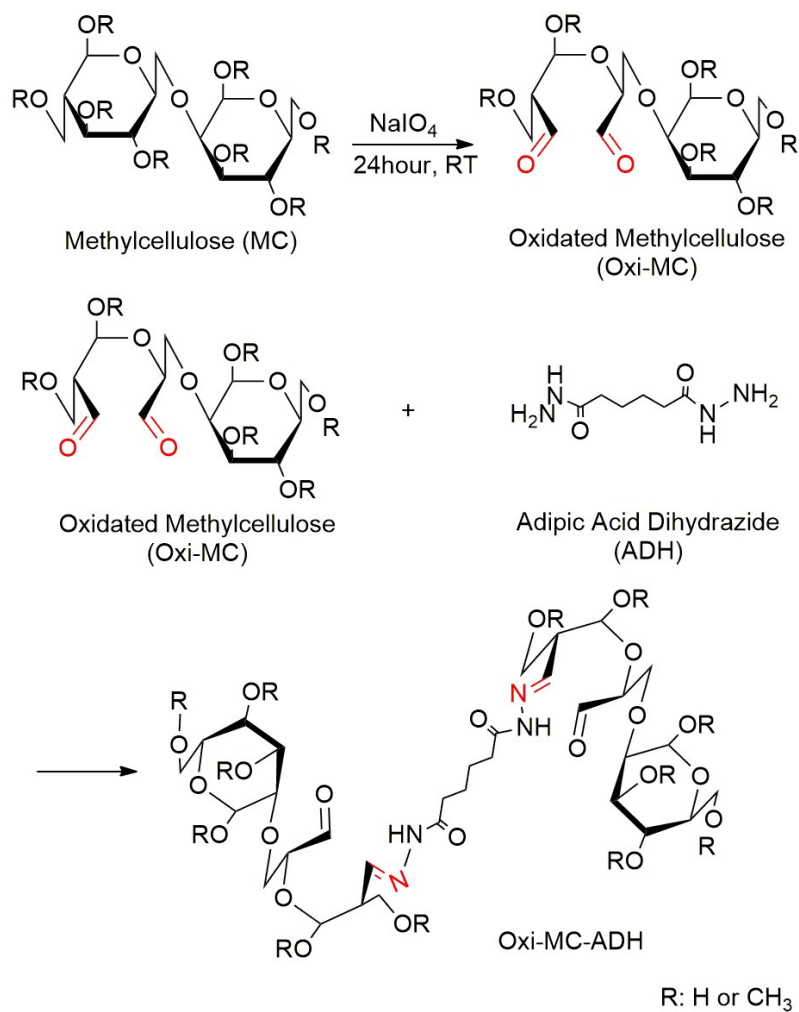

**Fig. S3** Chemical schematic of methylcellulose oxidation by sodium *meta*-periodate, and chemical crosslinking mechanism of oxi-MC-ADH hydrogel.

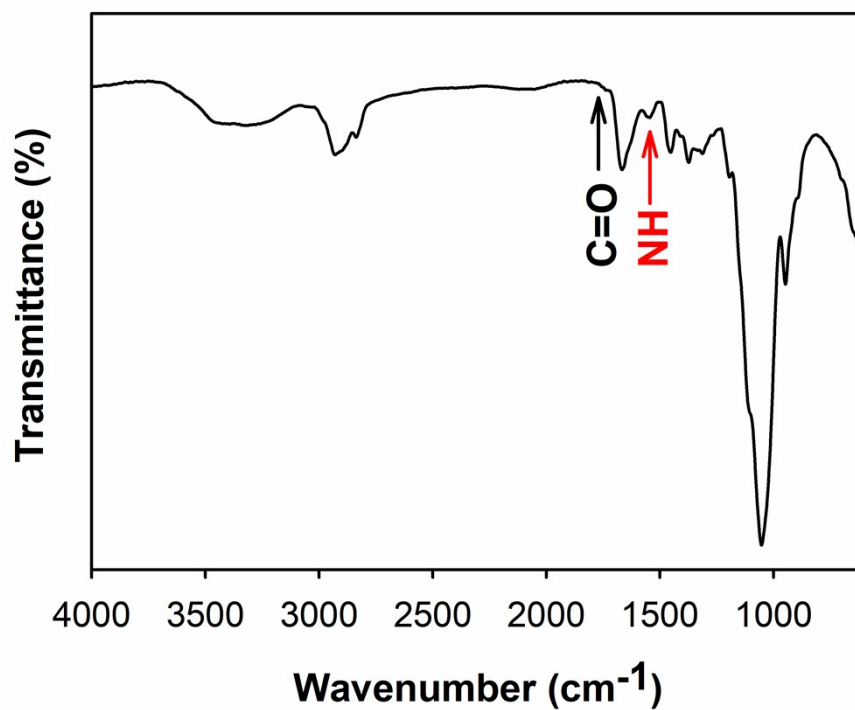

**Fig. S4** The FT-IR spectrum of oxi-MC-ADH.

**Control**

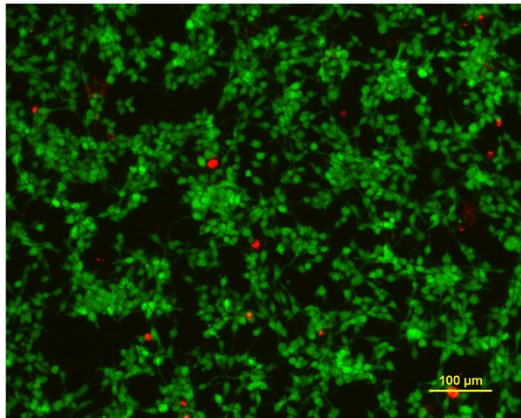

**50 μg/ml vitamin C**

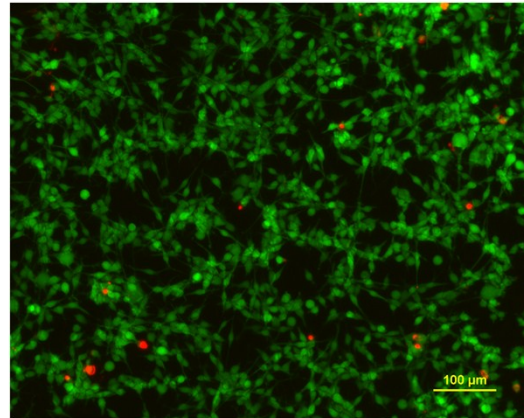

**100 μg/ml vitamin C**

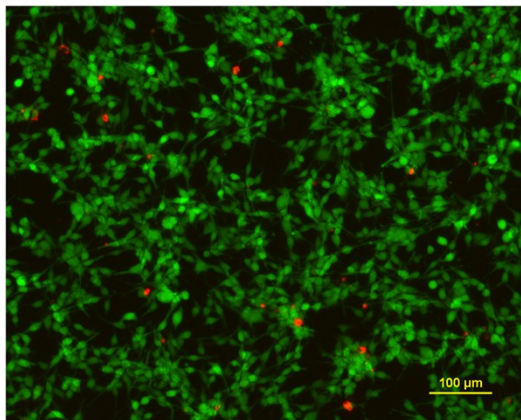

**250 μg/ml vitamin C**

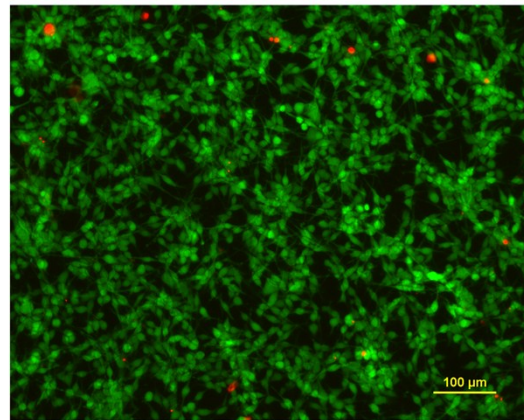

**500 μg/ml vitamin C**

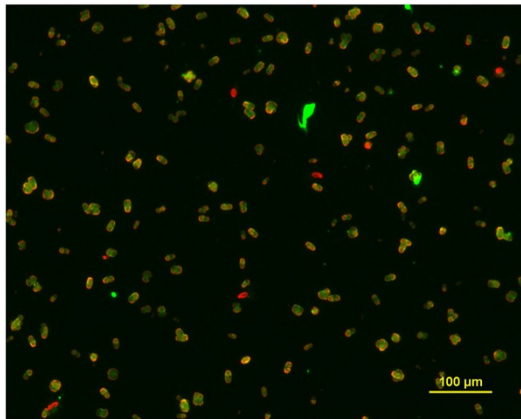

**1000 μg/ml vitamin C**

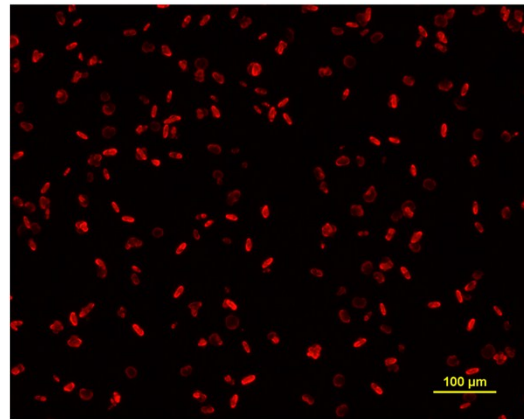

**Fig. S5** Concentrations of vitamin C were selected by Live/dead staining for various concentration cultured with B35 cells. Cells were stained with fluorescent probes to reveal live cells (green) and dead cells (red) (scale bar: 100 μm).

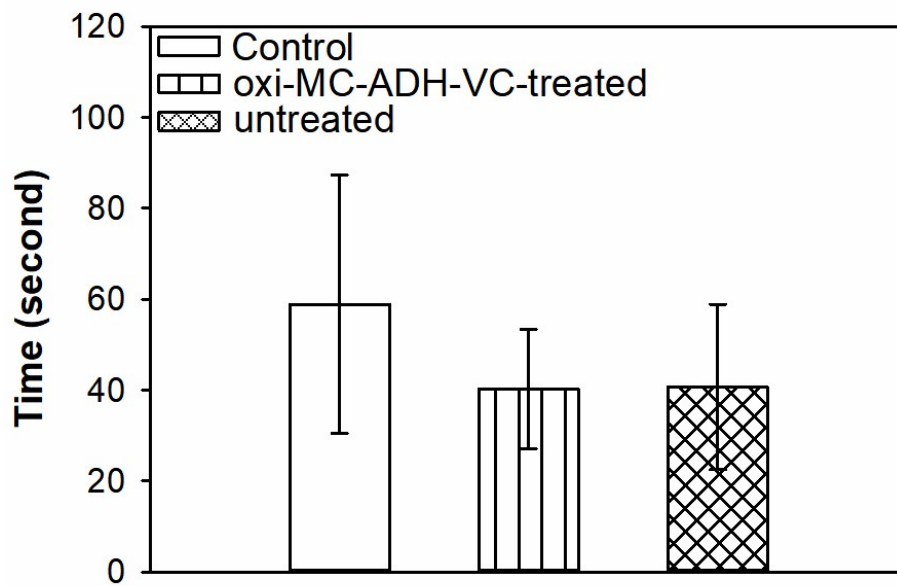

**Fig. S6** The mean ( $\pm$  standard deviation) of rotarod performance.

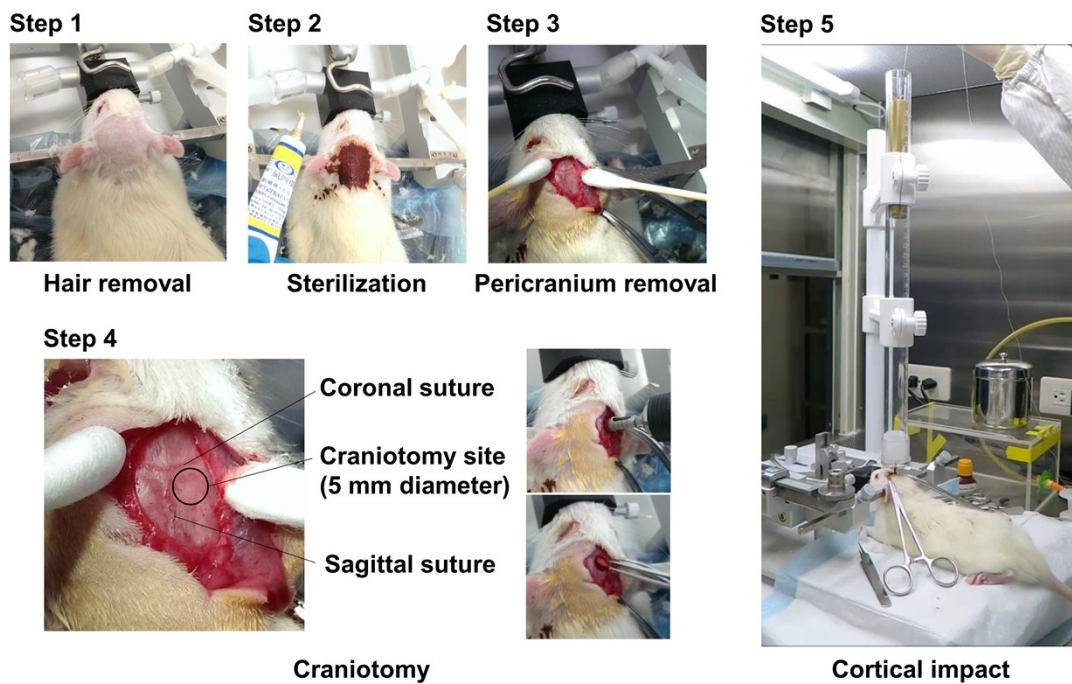

**Fig. S7.** Procedure of TBI animal model by cortical impact
